# Supplementary material for: Synthesis of hierarchical anatase TiO2 nanostructures with tunable morphology and enhanced photocatalytic activity
Source: Royal Society of Chemistry journal article supplement (doi:10.1039/c2ra21104a), 2012-01-01
Supplement: c2ra21104a.pdf [file c2ra21104a.pdf]

## **SUPPORTING INFORMATION**

### **Synthesis of Hierarchical Anatase TiO<sub>2</sub> Nanostructures with Tunable Morphology and Enhanced Photocatalytic Activity**

Raed Rahal, Atul Wankhade, Dongkyu Cha, Aziz Fihri, Samy Ould-Chikh, Umesh Patil and Vivek Polshettiwar\*

Nanocatalysis Laboratory (NanoCat), KAUST Catalysis Center (KCC), King Abdullah University of Science and Technology (KAUST), Thuwal (KSA). Email: [vivek.pol@kaust.edu.sa](mailto:vivek.pol@kaust.edu.sa) ; Tel: (+966) 2 808-0302; E-fax : (+966) 2 802-1253

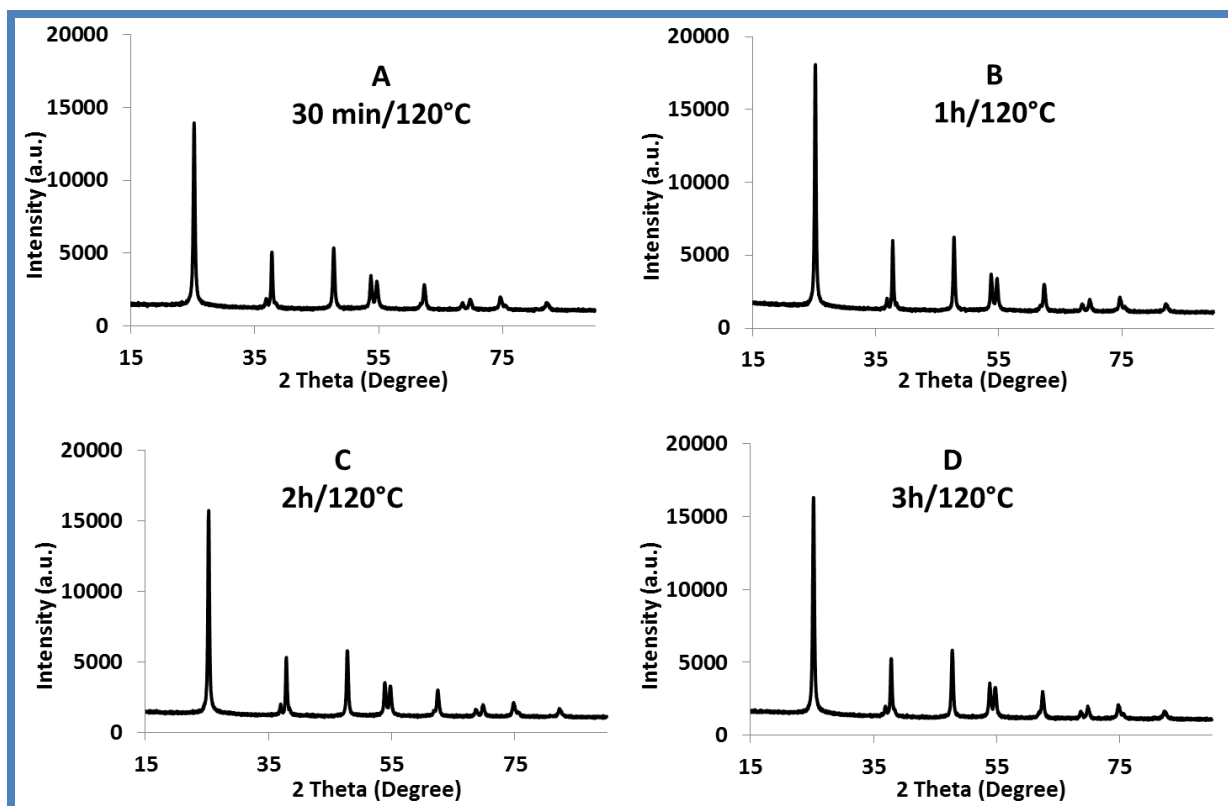

**Figure S1.** XRD pattern of TiO<sub>2</sub> nano-structures nano-structures obtained after microwave irradiation at 120°C for respectively A) 30 min; B) 1h; C) 2h and D) 3h (TiO<sub>2</sub>-II).

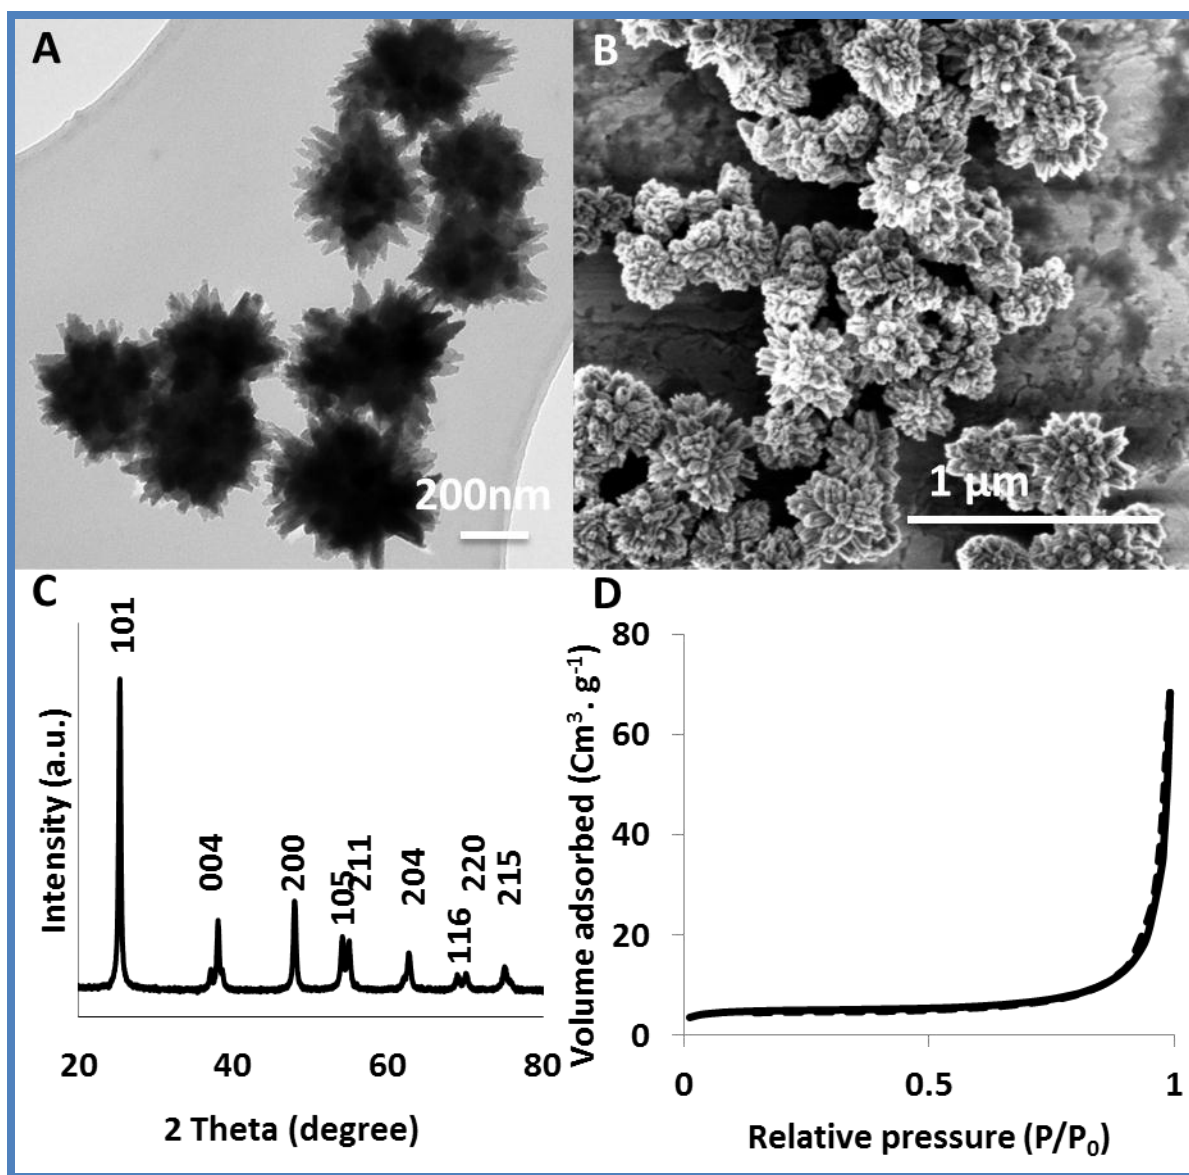

**Figure S2.** (A) TEM, (B) SEM, (C) XRD and (D) N<sub>2</sub> adsorption-desorption isotherm of the TiO<sub>2</sub>-III.

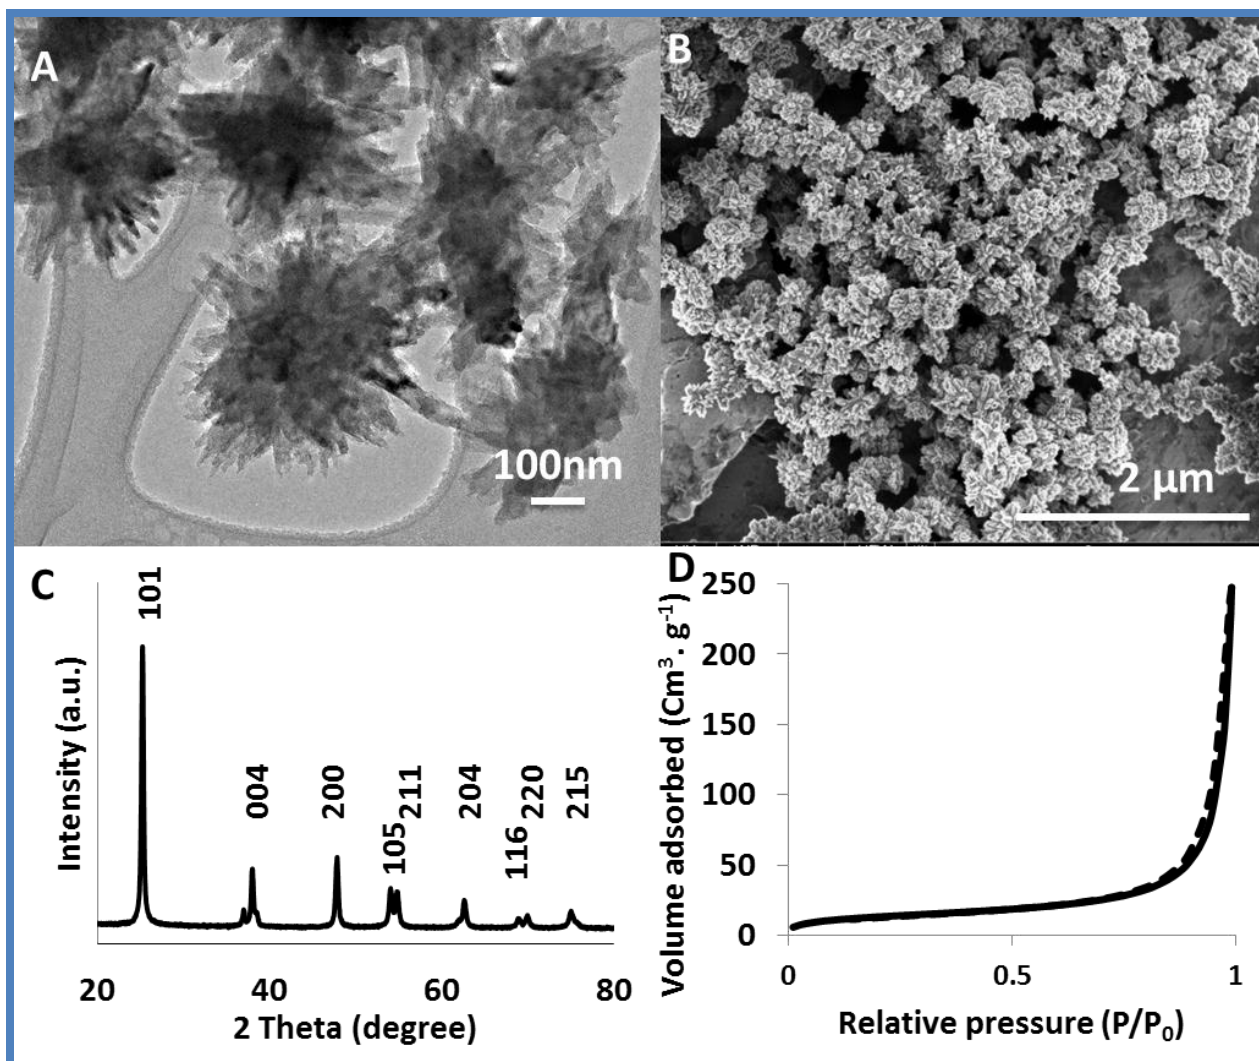

**Figure S3.** (A) TEM, (B) SEM, (C) XRD and (D) N<sub>2</sub> adsorption-desorption isotherm of the TiO<sub>2</sub>-IV.

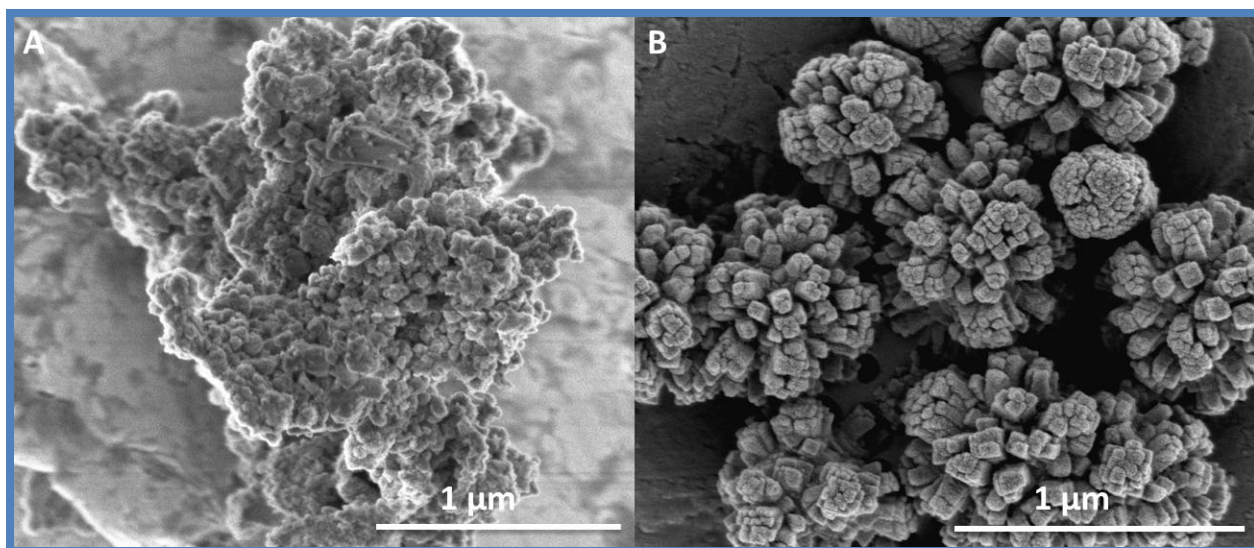

**Figure S4.** SEM images of TiO<sub>2</sub> nanostructures obtained after microwave irradiation at 120°C A) Without CTAB; B) only in pure water without using urea, pentanol and cyclohexane (TiO<sub>2</sub>-V).

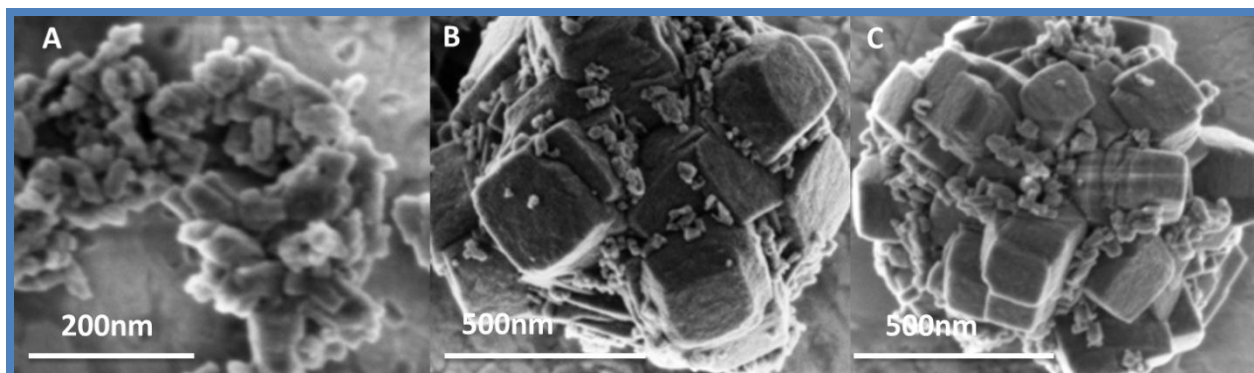

**Figure S5.** SEM images of the samples obtained in an autoclave after heating at 120°C a) 5 h; b) 10 h and c) 18 h.

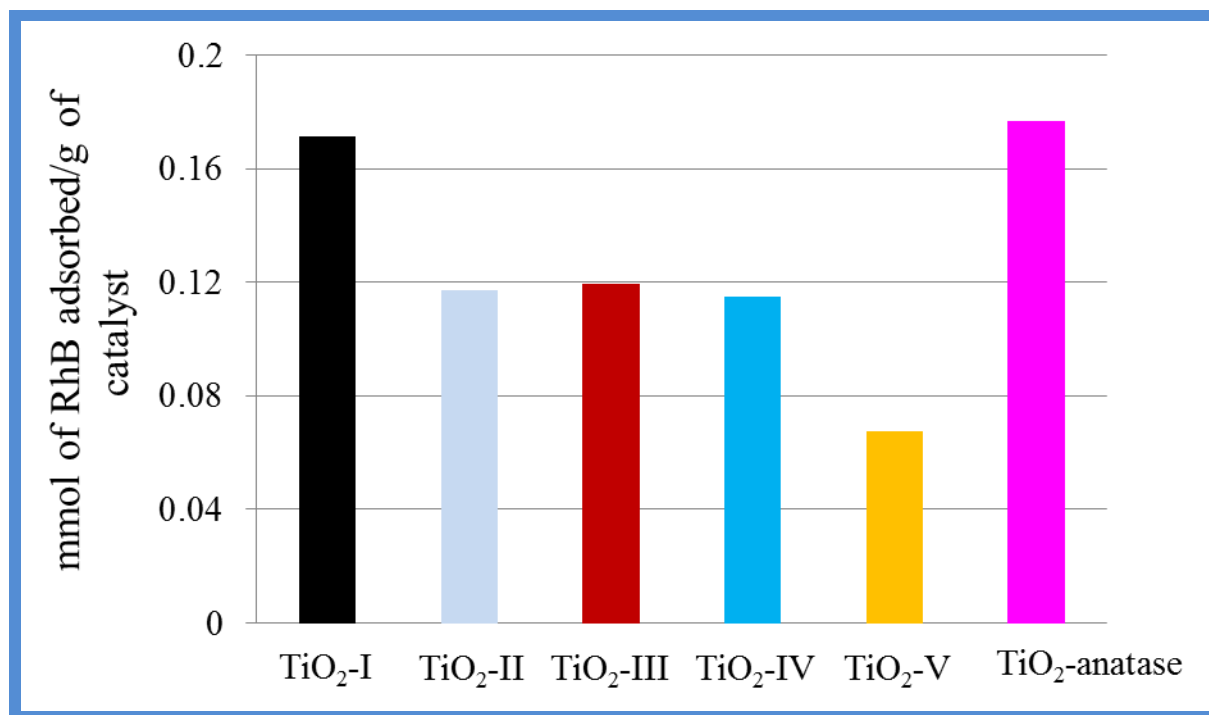

**Figure S6.** Adsorption amount of RhB per weight of catalyst, in photocatalytic degradation test of RhB in UV light.

Figure S6 shows adsorption amount to RhB on the various synthesized catalysts. TiO<sub>2</sub>-I shows higher adsorption than its other versions, which indicates that surface morphology also plays the role for the adsorption of reactant. Thus, RhB molecules enriched more around TiO<sub>2</sub>-I as compare to others, which in turn helped for its better catalytic performance.

Interestingly, standard TiO<sub>2</sub>-anatase shows similar adsorption as that of TiO<sub>2</sub>-I, but it has much lower photocatalytic activity. This again indicates the key role of shape and morphology of nanostructured TiO<sub>2</sub> in deciding its photocatalytic activity.
